# Supplementary material for: Inhibitors of Pathogen Intercellular Signals as Selective Anti-Infective Compounds
Source: PubMed Central journal article supplement (PMC2323289; doi:10.1371/journal.ppat.0030126), 2007-09-14

**Figure S2: The AA analogs 6FABA, 6CABA, and 4CABA inhibit A) transcription from *pqsA-E* promoter, B) pyocyanin, and C) elastase production.**

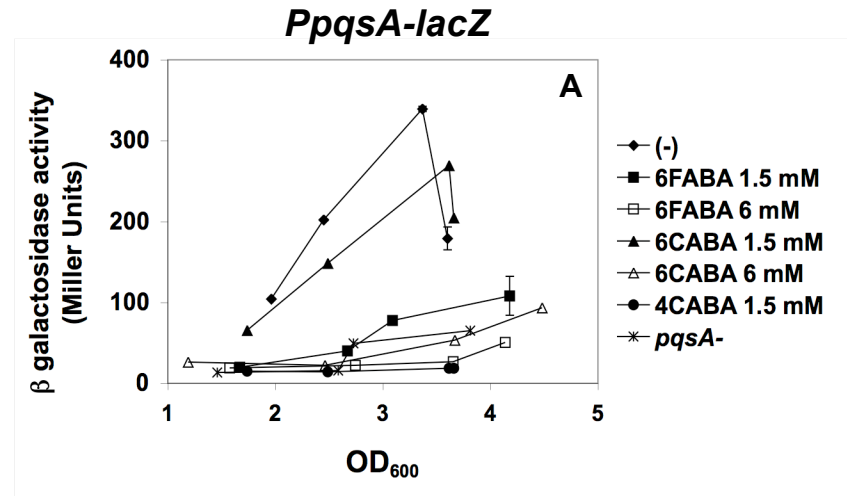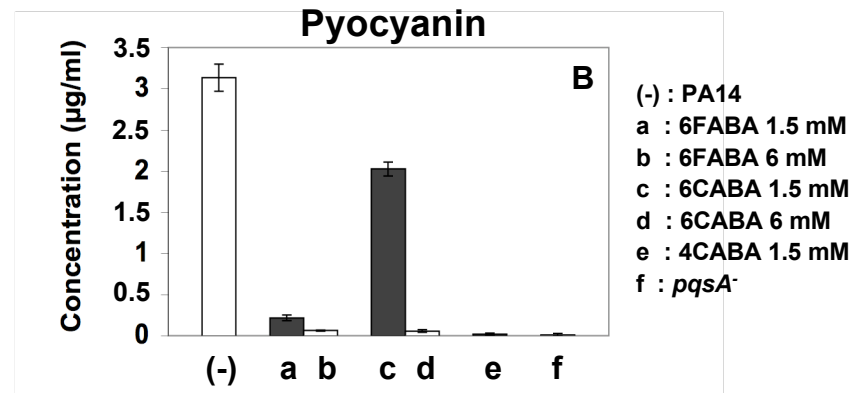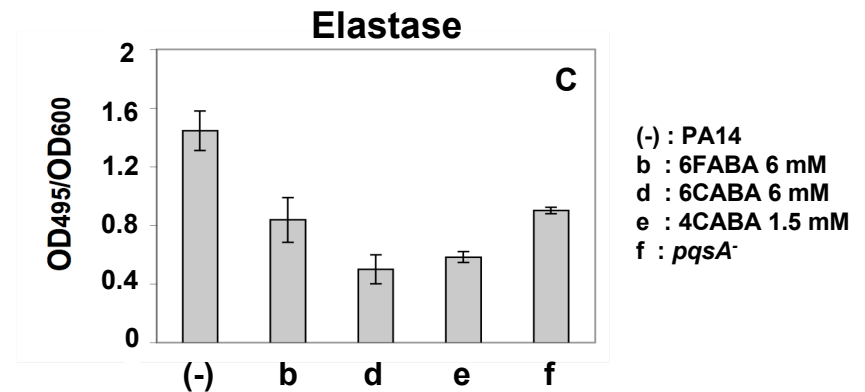

Supplement: ppat.0030126.sg002.pdf [file ppat.0030126.sg002.pdf]
